# Supplementary material for: The Prevalence of Metabolic Syndrome and Health-Related Behavior Changes: The Korea National Health Examination Survey
Source: PubMed Central journal article supplement (PMC7348718; doi:10.3390/healthcare8020134), 2020-05-15
Supplement: healthcare-08-00134-s001.pdf [file healthcare-08-00134-s001.pdf]

**Table S1.** The general characteristics according to the presence or absence of metabolic syndrome.

| Categories        | 2011         |         |          |         | 2013     |         |          |         | 2015     |         |          |         |      |
|-------------------|--------------|---------|----------|---------|----------|---------|----------|---------|----------|---------|----------|---------|------|
|                   | Normal       |         | MetS     |         | Normal   |         | MetS     |         | Normal   |         | MetS     |         |      |
|                   | <i>n</i>     | %       | <i>n</i> | %       | <i>n</i> | %       | <i>n</i> | %       | <i>n</i> | %       | <i>n</i> | %       |      |
| <b>Total</b>      | 413,480      | 100.0   | 164,936  | 100.0   | 413,079  | 100.0   | 165,337  | 100.0   | 394,967  | 100.0   | 183,449  | 100.0   |      |
| Sex               | Male         | 165,137 | 39.9     | 78,085  | 47.3     | 166,907 | 40.4     | 76,315  | 46.2     | 158,337 | 40.1     | 84,885  | 46.3 |
|                   | Female       | 248,343 | 60.1     | 86,851  | 52.7     | 246,172 | 59.6     | 89,022  | 53.8     | 236,630 | 59.9     | 98,564  | 53.7 |
| Age               | 40–49        | 167,810 | 40.6     | 39,596  | 24.0     | 127,035 | 30.8     | 28,642  | 17.3     | 90,919  | 23.0     | 24,624  | 13.4 |
|                   | 50–59        | 144,630 | 35.0     | 58,398  | 35.4     | 164,291 | 39.8     | 59,517  | 36.0     | 165,057 | 41.8     | 64,712  | 35.3 |
|                   | 60–69        | 75,818  | 18.3     | 47,099  | 28.6     | 85,626  | 20.7     | 49,606  | 30.0     | 94,857  | 24.0     | 58,159  | 31.7 |
|                   | ≥70          | 25,222  | 6.1      | 19,843  | 12.0     | 36,127  | 8.7      | 27,572  | 16.7     | 44,134  | 11.2     | 35,954  | 19.6 |
| Income            | 1st          | 64,768  | 15.7     | 26,690  | 16.2     | 67,471  | 16.3     | 27,552  | 16.7     | 65,497  | 16.6     | 30,731  | 16.8 |
|                   | 2nd          | 59,963  | 14.5     | 23,650  | 14.3     | 58,114  | 14.1     | 22,782  | 13.8     | 56,757  | 14.4     | 25,744  | 14.0 |
|                   | 3rd          | 72,478  | 17.5     | 29,726  | 18.0     | 71,186  | 17.2     | 29,057  | 17.6     | 65,924  | 16.7     | 31,213  | 17.0 |
|                   | 4th          | 90,504  | 21.9     | 37,329  | 22.6     | 89,131  | 21.6     | 37,204  | 22.5     | 84,924  | 21.5     | 40,844  | 22.3 |
|                   | 5th          | 125,767 | 30.4     | 47,541  | 28.8     | 127,177 | 30.8     | 48,742  | 29.5     | 121,865 | 30.9     | 54,917  | 29.9 |
| Location          | Metropolitan | 201,625 | 48.8     | 74,590  | 45.2     | 200,397 | 48.5     | 75,818  | 45.9     | 191,999 | 48.6     | 84,216  | 45.9 |
|                   | Cities       | 163,145 | 39.5     | 66,908  | 40.6     | 163,726 | 39.6     | 66,327  | 40.1     | 156,277 | 39.6     | 73,776  | 40.2 |
|                   | Rural        | 48,710  | 11.8     | 23,438  | 14.2     | 48,956  | 11.9     | 23,192  | 14.0     | 46,691  | 11.8     | 25,457  | 13.9 |
| Smoking           | Non-Smoking  | 341,941 | 82.7     | 133,245 | 80.8     | 346,140 | 83.8     | 136,162 | 82.4     | 341,310 | 86.4     | 155,550 | 84.8 |
|                   | Smoking      | 71,539  | 17.3     | 31,691  | 19.2     | 66,939  | 16.2     | 29,175  | 17.6     | 53,657  | 13.6     | 27,899  | 15.2 |
| Drinking          | Moderate     | 366,894 | 88.7     | 139,947 | 84.8     | 368,761 | 89.3     | 142,351 | 86.1     | 355,342 | 90.0     | 158,769 | 86.5 |
|                   | Heavy        | 46,586  | 11.3     | 24,989  | 15.2     | 44,318  | 10.7     | 22,986  | 13.9     | 39,625  | 10.0     | 24,680  | 13.5 |
| Physical Activity | Passive      | 255,738 | 61.9     | 104,152 | 63.1     | 247,393 | 59.9     | 102,523 | 62.0     | 227,167 | 57.5     | 111,135 | 60.6 |
|                   | Active       | 157,742 | 38.1     | 60,784  | 36.9     | 165,686 | 40.1     | 62,814  | 38.0     | 167,800 | 42.5     | 72,314  | 39.4 |

**Table S2.** The general characteristics according to health-related behavior.

| Smoking           |              | Continuous Non-smoking |       | Short-term Non-smoking |       | Short-term Smoking |       | Continuous Smoking |       |
|-------------------|--------------|------------------------|-------|------------------------|-------|--------------------|-------|--------------------|-------|
|                   |              | <i>n</i>               | %     | <i>n</i>               | %     | <i>n</i>           | %     | <i>n</i>           | %     |
| <b>Total</b>      |              | 457,133                | 100.0 | 39,727                 | 100.0 | 18,544             | 100.0 | 63,012             | 100.0 |
| Sex               | Male         | 140,397                | 30.7  | 31,925                 | 80.4  | 14,444             | 77.9  | 56,456             | 89.6  |
|                   | Female       | 316,736                | 69.3  | 7802                   | 19.6  | 4100               | 22.1  | 6,556              | 10.4  |
| Age               | 40–49        | 83,155                 | 18.2  | 8,646                  | 21.8  | 5069               | 27.3  | 18,673             | 29.6  |
|                   | 50–59        | 176,996                | 38.7  | 16,778                 | 42.2  | 8171               | 44.1  | 27,824             | 44.2  |
|                   | 60–69        | 126,100                | 27.6  | 10,222                 | 25.7  | 3944               | 21.3  | 12,750             | 20.2  |
|                   | ≥70          | 70,882                 | 15.5  | 4081                   | 10.3  | 1360               | 7.3   | 3765               | 6.0   |
| Income            | 1st          | 75,379                 | 16.5  | 6767                   | 17.0  | 3311               | 17.9  | 10,771             | 17.1  |
|                   | 2nd          | 62,150                 | 13.6  | 6487                   | 16.3  | 3062               | 16.5  | 10,802             | 17.1  |
|                   | 3rd          | 74,379                 | 16.3  | 7282                   | 18.3  | 3427               | 18.5  | 12,049             | 19.1  |
|                   | 4th          | 99,849                 | 21.8  | 8763                   | 22.1  | 3748               | 20.2  | 13,408             | 21.3  |
|                   | 5th          | 145,376                | 31.8  | 10,428                 | 26.2  | 4996               | 26.9  | 15,982             | 25.4  |
| Location          | Metropolitan | 219,386                | 48.0  | 18,380                 | 46.3  | 8662               | 46.7  | 29,787             | 47.3  |
|                   | Cities       | 181,009                | 39.6  | 16,096                 | 40.5  | 7556               | 40.7  | 25,392             | 40.3  |
|                   | Rural        | 56,738                 | 12.4  | 5251                   | 13.2  | 2326               | 12.5  | 7833               | 12.4  |
| Drinking          |              | Continuous Moderate    |       | Short-term Moderate    |       | Short-term Heavy   |       | Continuous Heavy   |       |
|                   |              | <i>n</i>               | %     | <i>n</i>               | %     | <i>n</i>           | %     | <i>n</i>           | %     |
| <b>Total</b>      |              | 465,147                | 100.0 | 48,964                 | 100.0 | 37,460             | 100.0 | 26,845             | 100.0 |
| Sex               | Male         | 152,110                | 32.7  | 37,409                 | 76.4  | 29,872             | 79.7  | 23,831             | 88.8  |
|                   | Female       | 313,037                | 67.3  | 11,555                 | 23.6  | 7588               | 20.3  | 3014               | 11.2  |
| Age               | 40–49        | 83,584                 | 18.0  | 11,722                 | 23.9  | 11,048             | 29.5  | 9189               | 34.2  |
|                   | 50–59        | 177,400                | 38.1  | 22,382                 | 45.7  | 17,290             | 46.2  | 12,697             | 47.3  |
|                   | 60–69        | 130,051                | 28.0  | 11,378                 | 23.2  | 7341               | 19.6  | 4246               | 15.8  |
|                   | ≥70          | 74,112                 | 15.9  | 3482                   | 7.1   | 1781               | 4.8   | 713                | 2.7   |
| Income            | 1st          | 78,077                 | 16.8  | 8120                   | 16.6  | 5976               | 16.0  | 4055               | 15.1  |
|                   | 2nd          | 64,445                 | 13.9  | 8022                   | 16.4  | 5958               | 15.9  | 4076               | 15.2  |
|                   | 3rd          | 76,675                 | 16.5  | 9020                   | 18.4  | 6746               | 18.0  | 4696               | 17.5  |
|                   | 4th          | 101,285                | 21.8  | 10,622                 | 21.7  | 8165               | 21.8  | 5696               | 21.2  |
|                   | 5th          | 144,665                | 31.1  | 13,180                 | 26.9  | 10,615             | 28.3  | 8322               | 31.0  |
| Location          | Metropolitan | 222,263                | 47.8  | 23,249                 | 47.5  | 17,848             | 47.6  | 12,855             | 47.9  |
|                   | Cities       | 185,039                | 39.8  | 19,386                 | 39.6  | 14,965             | 39.9  | 10,663             | 39.7  |
|                   | Rural        | 57,845                 | 12.4  | 6329                   | 12.9  | 4647               | 12.4  | 3327               | 12.4  |
| Physical Activity |              | Continuous Passive     |       | Short-term Passive     |       | Short-term Active  |       | Continuous Active  |       |
|                   |              | <i>n</i>               | %     | <i>n</i>               | %     | <i>n</i>           | %     | <i>n</i>           | %     |
| <b>Total</b>      |              | 183,138                | 100.0 | 155,164                | 100.0 | 161,729            | 100.0 | 78,385             | 100.0 |
| Sex               | Male         | 73,575                 | 40.2  | 63,888                 | 41.2  | 68,195             | 42.2  | 37,564             | 47.9  |
|                   | Female       | 109,563                | 59.8  | 91,276                 | 58.8  | 93,534             | 57.8  | 40,821             | 52.1  |
| Age               | 40–49        | 43,031                 | 23.5  | 29,130                 | 18.8  | 30,732             | 19.0  | 12,650             | 16.1  |
|                   | 50–59        | 76,354                 | 41.7  | 61,510                 | 39.6  | 63,928             | 39.5  | 27,977             | 35.7  |
|                   | 60–69        | 40,600                 | 22.2  | 41,890                 | 27.0  | 45,353             | 28.0  | 25,173             | 32.1  |
|                   | ≥70          | 23,153                 | 12.6  | 22,634                 | 14.6  | 21,716             | 13.4  | 12,585             | 16.1  |
| Income            | 1st          | 30,303                 | 16.5  | 26,350                 | 17.0  | 27,222             | 16.8  | 12,353             | 15.8  |
|                   | 2nd          | 26,534                 | 14.5  | 22,708                 | 14.6  | 23,296             | 14.4  | 9963               | 12.7  |
|                   | 3rd          | 31,404                 | 17.1  | 26,652                 | 17.2  | 27,065             | 16.7  | 12,016             | 15.3  |

|          |              |        |      |        |      |        |      |        |      |
|----------|--------------|--------|------|--------|------|--------|------|--------|------|
|          | 4th          | 40,038 | 21.9 | 33,663 | 21.7 | 35,277 | 21.8 | 16,790 | 21.4 |
|          | 5th          | 54,859 | 30.0 | 45,791 | 29.5 | 48,869 | 30.2 | 27,263 | 34.8 |
|          | Metropolitan | 79,963 | 43.7 | 74,004 | 47.7 | 79,786 | 49.3 | 42,462 | 54.2 |
| Location | Cities       | 76,431 | 41.7 | 60,924 | 39.3 | 63,354 | 39.2 | 29,344 | 37.4 |
|          | Rural        | 26,744 | 14.6 | 20,236 | 13.0 | 18,589 | 11.5 | 6579   | 8.4  |
